*Invited Comment***Oxygen species in the microvascular environment: regulation of vascular tone and the development of hypertension**

Mauro Rathaus and Jacques Bernheim

Department of Nephrology and Hypertension, Sapir Medical Center, Kfar Saba and Tel Aviv University, Israel

**Abstract**

Derangements of the three endothelium-related vasodilator systems (prostaglandins, endothelium-derived hyperpolarizing factor(s) and nitric oxide) cause the endothelial dysfunction observed in hypertension. Free radical-induced nitric oxide degradation plays a crucial role in hypertension. An increase in superoxide producing enzymes such as NAD(P)H oxidase and xanthine oxidase has been demonstrated. Superoxide dismutase may correct endothelial dysfunction *in vitro* and superoxide dismutase mimetics can lower blood pressure in experimental animals. Antioxidant agents and xanthine oxidase-inhibiting compounds have been used in humans. In addition, the synthesis of vasoconstrictor peroxides derived from the activity of cyclooxygenase in the endothelium and the vascular smooth muscle is stimulated by the OH<sup>•</sup> radical. Hydrogen peroxide levels are augmented in hypertension, but its role is unclear because recent investigations have shown that this substance may act as a hyperpolarizing factor. It is thought that the therapeutic benefit of anti-hypertensive drugs, such as calcium antagonists and angiotensin-converting enzyme inhibitors, could be in part due to an inhibition of free radical production. A role of superoxide in the endothelial dysfunction and hypertension of chronic renal failure has also been suggested by recent animal experiments.

**Keywords:** endothelium; hydrogen peroxide; hypertension; nitric oxide; oxydri radical; superoxide

**Introduction**

The control of circulatory homeostasis depends on vascular endothelium responses to chemical, hormonal and haemodynamic changes. The endothelium releases

mediators which affect vascular smooth muscle cell activity. Imbalance between vasodilators and vasoconstrictors, inducing endothelial dysfunction, has been described in a variety of conditions [1]. Depressed endothelium-dependent vascular relaxation was first demonstrated in spontaneously hypertensive rats (SHR) by Konishi and Su in 1983 [2]. This phenomenon occurs progressively as arterial pressure increases with age [3]. By contrast, the response to sodium nitroprusside or nitroglycerine [4] is maintained. Endothelial dysfunction is similarly present in patients with essential hypertension [5–8], and even in their normotensive descendants [9]. However, it is still unclear whether endothelial dysfunction causes the hypertensive process or, in contrast, high arterial pressure damages the endothelium. Whatever the sequence of events, endothelial dysfunction may maintain increased vascular resistance, leading to hypertension and its complications [10].

**Locally released endothelium-derived vasodilators in hypertension**

The term endothelial dysfunction refers to alterations of endothelial properties, such as anticoagulant and anti-inflammatory functions, modulation of vascular growth and remodeling. However, in the context of tone control (and hypertension), this term indicates deranged vasodilator activity. Three main vasodilator pathways have been recognized. The first is cyclooxygenase dependent [11,12]. Two mechanisms which have received much attention recently are the nitric oxide (NO)-dependent mechanism [13] and those related to a heterogeneous group of substances, defined as endothelial-derived hyperpolarizing factor(s) (EDHF) [14]. EDHF is involved in shear stress-induced endothelium-dependent relaxation via Ca-activated K channels [15], and is thought to modulate vasoconstriction [16], and to mediate the response to contractions induced by  $\alpha$ 1-adrenoceptor stimulation of smooth muscle, at least in the mesenteric artery [17].

---

Correspondence and offprint requests to: Mauro Rathaus, MD, Department of Nephrology and Hypertension, Sapir Medical Center, 44281 Kfar Saba, Israel. Email: maurorat@clalit.org.il

All these systems are altered in hypertension. Abnormal synthesis of prostaglandins has been described in human and animal hypertension [11,12]. There is a decrease in the basal production of NO and expression of endothelial NO synthase in SHR [18,19], although in the salt-sensitive hypertensive Dahl rat, no alteration of NO synthase genes was found [20]. Hypertensive patients are not deficient in L-arginine and its administration fails to improve acetylcholine response [5,6,8]. However, NO synthesis inhibitors provoke less vasoconstriction in the forearm of hypertensive patients than normotensive controls [21], suggesting decreased NO bioavailability. No association was found between NO synthase gene markers and hypertension in humans [22]. In SHR rats, decreased EDHF-related endothelial function is associated with decreased NO system activity [23]. These changes are reversible in response to antihypertensive treatment [24], administration of cholecalciferol, which normalizes blood pressure [25], and endothelin receptor antagonists [26].

### Superoxide-NO relationship in the control of vascular tone

Recent research suggests that NO degradation is increased in the presence of excessive production of free radicals such as superoxide anion ( $O_2^{\cdot-}$ ) [27,28]. In several pathological conditions, in which endothelial dysfunction is related to decreased NO bioactivity (diabetes mellitus, arteriosclerosis, cigarette smoking, hypercholesterolaemia, hypertension), the vascular production of superoxide is increased. Because  $O_2^{\cdot-}$  and NO both contain unpaired electrons in their outer orbitals, they undergo an extremely rapid, diffusion-limited radical/radical reaction, leading to formation of peroxynitrite anion ( $ONOO^-$ ), a strong oxidant which is rapidly protonated at physiological pH to yield the highly reactive peroxynitrous acid, which in turn generates the hydroxyl radical  $OH^{\cdot}$  [29]. Production of  $O_2^{\cdot-}$  in the vessel wall inactivates NO and blunts endothelium-dependent vasodilation [30]. Thus, controlling the amount of  $O_2^{\cdot-}$  is critically important for preserving NO bioactivity at the level of the vessel wall.

NAD(P)H oxidases are major sources of superoxide in vascular cells. The NAD(P)H oxidases of the cardiovascular system are membrane-associated enzymes that catalyze the 1-electron reduction of oxygen using NADH or NADPH as the electron donor [31]. Upon stimulation by various agents,  $O_2^{\cdot-}$  is produced within minutes to hours by endothelial cells and vascular smooth muscle cells [32,33], in contrast to the almost instantaneous release seen in neutrophils. One of the most important attributes of the cardiovascular oxidase is its responsiveness to hormones and vasoactive substances (angiotensin II, thrombin, PDGF, TNF- $\alpha$ ), haemodynamic forces and local metabolic changes. Activation of the oxidase can be

mediated by intracellular second messengers, including calcium, protein kinase C and lipoxygenase metabolites of arachidonic acid [31]. A second enzymatic pathway generating superoxide in the vessel wall is xanthine-oxidase (XO). Because the measurement of the activity of this enzyme remains difficult, its precise role in vascular physiology is still unclear and rests mainly on indirect evidence derived from studies of the effects of antagonists of enzyme activity such as oxypurinol [34]. Recently a molybdenum-deficient form of XO has been identified, which uses NADH as its substrate [35]. It is thus possible that some of the evidence gathered on NADH-oxidase reflects in fact the activity of this modified form of XO. A third enzyme capable of producing  $O_2^{\cdot-}$  is endothelial nitric oxide synthase (eNOS). This enzyme uses L-arginine as its substrate and needs tetrahydrobiopterin ( $BH_4$ ) bound near its heme group in order to produce NO. In absence of substrate or  $BH_4$  (eNOS uncoupling), eNOS produces  $O_2^{\cdot-}$  [36–38]. There is evidence that this occurs in some forms of hypertension (see below). In addition, it has recently been demonstrated that eNOS may produce  $O_2^{\cdot-}$  and  $H_2O_2$  even in normal conditions [39].

The superoxide dismutases (SOD) represent a major cellular defense against  $O_2^{\cdot-}$  and formation of peroxynitrite [40]. Three isoenzymes have been identified, including a cytosolic copper/zinc-containing form (Cu/ZnSOD), a mitochondrial manganese-containing form (MnSOD), and an extracellular isoenzyme (ecSOD), which is also a copper/zinc-containing enzyme. In the vessel wall, one third to one half of total SOD activity is made up by ecSOD [41]. Immunohistochemical studies have shown that vascular ecSOD is localized in high concentrations between the endothelium and the smooth muscle layer, which endothelium-derived NO must cross to stimulate smooth muscle relaxation [42]. Upregulation of ecSOD in response to NO has been demonstrated. This can reduce reactions of NO with  $O_2^{\cdot-}$ , thereby enhancing the beneficial biologic effects of NO released by the endothelium.

### Vascular superoxide in hypertension

Evidence for microvascular oxidative stress in animal hypertension has accumulated recently [43–45]. Blood SOD activity is lower in ISIAH (stress-sensitive) rats compared with that of Wistar rats [46]. Moreover, the functional importance of reactive oxygen species (ROS) in hypertension has been suggested by the fact that the administration of tempol (a stable membrane-permeable SOD mimetic) or heparin-binding SOD, which localizes within the vessel wall, normalized blood pressure in SHR [27,47]. Similar findings have been demonstrated in DOCA-salt hypertension [48] and in renovascular hypertensive rats [49]. In the model of chronic infusion of angiotensin II in rats, the NAD(P)H subunit p22phox mRNA is upregulated and

NAD(P)H oxidase-derived  $O_2^{\cdot -}$  production increases [31]. Both hypertension and the increase in p22phox mRNA were prevented by pretreatment with SOD [50]. Aortic NAD(P)H oxidase activity and expression of p22phox messenger RNA are elevated in SHR, and both are decreased after antihypertensive treatment [51]. Superoxide anions may be involved in the development of hypertension-related cardiac hypertrophy [52], stroke [53] and renal damage [54] observed in SHR. It should also be mentioned that Na loading decreases endothelium-dependent vasodilation in normotensive [55], spontaneously hypertensive [56] and salt-sensitive Dahl rats [57] as well as in the DOCA-salt model of hypertension [58]. A recent study has shown that salt loading stimulates the production of reactive oxygen species in resistance vessels from normotensive rats [59]. Erythrocyte SOD activity is reduced in patients with essential hypertension [60] and in hypertensive pregnant women [61].

### Other reactive oxygen species ( $OH^{\cdot -}$ and $H_2O_2$ )

In essential hypertension, the role played by vasoconstrictor cyclooxygenase (COX) products, such as  $PGH_2$  and thromboxane [62] is probably important. COX expression is elevated in SHR rats [62] and acetylcholine paradoxically produces endothelium-dependent contractions. These can be inhibited by selective COX-1 inhibitors, which also reduce blood pressure [63]. Recent evidence shows that  $OH^{\cdot -}$ , originating from endothelial  $O_2^{\cdot -}$  produced through the XO pathway, stimulates COX [14].

Plasma concentrations of  $H_2O_2$  are elevated in salt-sensitive Dahl rats [64], and  $H_2O_2$  produces  $PGH_2/TXA_2$ -mediated contraction in aortic segments from SHR. On the other hand,  $H_2O_2$  impairs KCl-induced contraction, acting as a K channel opener (EDHF) [39,65], and induces relaxation via ATP-sensitive K channels in endothelium-denuded aortic rings taken from SHR. Relaxation in response to levcromakalim (an ATP-channel opener) is augmented in SHR aorta. Catalase, but not SOD or desferrioxamine reduced them. These results suggest that in chronic hypertension, vasorelaxation to an ATP-sensitive K channel opener is augmented and that  $H_2O_2$  produced in smooth muscle cells may partly contribute to these relaxations [66].  $H_2O_2$  levels are elevated in humans with essential hypertension. Hydrogen peroxide production was correlated positively with plasma rennin activity (PRA), and negatively with cardiac contractility and renal function [67].

### Free radical production inhibitors in hypertension

Antioxidant agents have been used to treat endothelial dysfunction, as found in arterial hypertension [68]. In hypertensive patients, vitamin C improves coronary

artery responses to acetylcholine and the endothelium-dependent vasomotor capacity [69] and intravenous infusion of ascorbic acid at high-dose ameliorated the impaired endothelium-dependent vasodilation to methacholine [70]. Administration of xanthine oxidase inhibitors, such as allopurinol, given intravenously to SHR, produces a temporary drop in arterial blood pressure [71]. Oxypurinol, with a longer half-life, was effective in reversing endothelial dysfunction in double transgenic hypertensive rats, carrying the human renin and angiotensinogen genes [72]. However, oxypurinol did not affect blood pressure in human hypertension [73].

### Effect of antihypertensive drugs on free radical production

Angiotensin-converting enzyme inhibitors [74] and calcium antagonists [75] improve endothelium-dependent vasodilation in hypertensive patients, and facilitate the vasoconstrictor responses of NO antagonists [76]. This may be, at least in part, the consequence of their antioxidant action, inhibiting free radical production [77,78]. A similar action has been reported with losartan, an angiotensin II receptor antagonist, which depressed the angiotensin II-induced production of superoxide radicals [79].

### Oxygen free radicals in endothelial dysfunction and hypertension of chronic renal failure

Hypertension, common in patients with chronic renal failure (CRF), is a major determinant of the rate of deterioration of renal function, and of morbidity and mortality of dialysis patients [80]. Its pathogenesis is not well understood. Endothelial dysfunction due to reduced NO bioactivity [81], has been demonstrated by experimental [82] and human [83,84] studies. There is evidence that oxidative stress occurs early during the evolution of CRF. Parameters of oxidative stress and antioxidant enzyme activities are altered in CRF patients [85–87]. The activity of antioxidant enzymes decreases in the renal cortex of rats after subtotal nephrectomy [88,89], and the associated increase in oxidative stress seems to play a role in the development of renal fibrosis, since antioxidant treatments (vitamin E [90] or magnesium lithospermate B [88]) may hinder its progression. Very little is known of the role played by superoxide in endothelial dysfunction and hypertension in CRF. In one study, the antioxidant substance lazaroid has decreased blood pressure in rats after subtotal nephrectomy [91]. We have recently shown that exogenous SOD restores the decreased response to acetylcholine in isolated mesenteric arteries from rats after 5/6 nephrectomy and the SOD-mimetic tempol prevents the increase of blood pressure in these animals [92]. These studies suggest that increased superoxide production in the vascular

wall is an important pathogenetic factor in the development of endothelial dysfunction and high blood pressure in CRF.

*Acknowledgement.* This work has been supported by a Grant from the Office of the Chief Scientist of the Ministry of Health, Israel.

## References

- Vanhoutte PM. Endothelial dysfunction in hypertension. *J Hypertens* 1996; 14 [Suppl 5]: S83–93
- Konishi M, Su C. Role of endothelium in dilator responses of spontaneously hypertensive rat arteries. *Hypertension* 1983; 5: 881–886
- Hongo K, Nakagomi T, Kassell NF, Sasaki T, Lehman M, Vollmer DG, Tsukahara T, Ogawa H, Torner J. Effects of aging and hypertension on endothelium-dependent vascular relaxation in rat carotid artery. *Stroke* 1988; 19: 892–897
- Wu X, Makynen H, Kahonen M, Arvola P, Porsti I. Mesenteric arterial function in vitro in three models of experimental hypertension. *J Hypertens* 1996; 14: 365–372
- Linder L, Kiowski W, Buhler FR, Luscher TF. Indirect evidence for release of endothelium-derived relaxing factor in human forearm circulation *in vivo*. Blunted response in essential hypertension. *Circulation* 1990; 81: 1762–1767
- Panza JA, Quyyumi AA, Brush JE, Epstein SE. Abnormal endothelium dependent vascular relaxation in patients with essential hypertension. *N Engl J Med* 1990; 323: 22–27
- Panza JA, Garcia CE, Kilcoyne CM, Quyyumi AA, Cannon RO 3rd. Impaired endothelium-dependent vasodilation in patients with essential hypertension. *Circulation* 1995; 91: 1732–1738
- Taddei S, Virdis A, Mattei P, Salvetti A. Vasodilatation to acetylcholine in primary and secondary forms of human hypertension. *Hypertension* 1993; 21: 929–933
- Taddei S, Virdis A, Mattei P, Arzilli F, Salvetti A. Endothelium-dependent forearm vasodilation is reduced in normotensive subjects with familial history of hypertension. *J Cardiovasc Pharmacol* 1992; 20 [Suppl 12]: S193–195
- Hednet T, Sun X. Measures of endothelial function as an endpoint in hypertension. *Blood Press Suppl* 1997; 2: 58–66
- Rathaus M, Korzets Z, Bernheim J. The urinary excretion of prostaglandins E<sub>2</sub> and F<sub>2α</sub> in essential hypertension. *Eur J Clin Invest* 1983; 13: 13–17
- Matrougui K, Maclouf J, Levy BI, Henrion D. Impaired nitric oxide- and prostaglandin-mediated responses to flow in resistance arteries of hypertensive rats. *Hypertension* 1997; 30: 942–947
- Cardillo C, Kilcoyne CM, Quyyumi AA, Cannon RO 3rd, Panza JA. Selective defect in nitric oxide synthesis may explain the impaired endothelium-dependent vasodilation in patients with essential hypertension. *Circulation* 1998; 97: 851–856
- Vanhoutte PM. Endothelium-derived free radicals: for worse and for better. *J Clin Invest* 2001; 107: 23–25
- Takamura Y, Shimokawa H, Zhao H, Igarashi H, Egashira K, Takeshita A. Important role of endothelium-derived hyperpolarizing factor in shear stress-induced endothelium-dependent relaxations in the rat mesenteric artery. *J Cardiovasc Pharmacol* 1999; 34: 381–387
- Abdullah K, Docherty JR. Comparison of the effects of nitric oxide synthase, guanylate cyclase and potassium channel inhibition on vascular contractions *in vitro* in the rat. *J Auton Pharmacol* 1999; 19: 263–266
- Dora KA, Hinton JM, Walker SD, Garland CJ. An indirect influence of phenylephrine on the release of endothelium-derived vasodilators in rat small mesenteric artery. *Br J Pharmacol* 2000; 129: 381–387
- Crabos M, Coste P, Paccalin M, Tariosse L, Daret D, Besse P, Bonoron Adele S. Reduced basal NO-mediated dilation and decreased endothelial NO-synthase expression in coronary vessels of spontaneously hypertensive rats. *J Mol Cell Cardiol* 1997; 29: 55–65
- Chou TC, Yen MH, Li CY, Ding YA. Alterations of nitric oxide synthase expression with aging and hypertension in rats. *Hypertension* 1998; 31: 643–648
- Deng AY, Rapp JP. Absence of linkage for ‘endothelial’ nitric oxide synthase locus to blood pressure in Dahl rats. *Hypertension* 1997; 29: 49–52
- Lyons D. Impairment and restoration of nitric oxide-dependent vasodilation in cardiovascular disease. *Int J Cardiol* 1997; 62 [Suppl 2]: S101–109
- Benjafeld AV, Morris BJ. Association analyses of endothelial nitric oxide synthase gene polymorphisms in essential hypertension. *Am J Hypertens* 2000; 13: 994–998
- Sunano S, Watanabe H, Tanaka S, Sekiguchi F, Shimamura K. Endothelium-derived relaxing, contracting and hyperpolarizing factors of mesenteric arteries of hypertensive and normotensive rats. *Br J Pharmacol* 1999; 126: 709–716
- Onaka U, Fujii K, Abe I, Fujishima M. Antihypertensive treatment improves endothelium-dependent hyperpolarization in the mesenteric artery of spontaneously hypertensive rats. *Circulation* 1998; 98: 175–182
- Borges AC, Feres T, Vianna LM, Paiva TB. Recovery of impaired K<sup>+</sup> channels in mesenteric arteries from spontaneously hypertensive rats by prolonged treatment with cholecalciferol. *Br J Pharmacol* 1999; 127: 772–778
- Iglarz M, Levy BI, Henrion D. Prolonged blockade of endothelin ET(A) receptors decreases vascular reactivity in the aorta of spontaneously hypertensive rats *in vitro*. *J Cardiovasc Pharmacol* 1999; 34: 354–358
- Nakazono K, Watanabe N, Matsuno K, Sasaki J, Sato T, Inoue M. Does superoxide underlie the pathogenesis of hypertension? *Proc Natl Acad Sci USA* 1991; 88: 10045–10048
- Beckman JS, Koppenol WH. Nitric oxide, superoxide and peroxynitrite: the good, the bad, and the ugly. *Am J Physiol* 1996; 271: C1424–C1427
- Rubanyi GM, Vanhoutte PM. Superoxide anions and hypoxia inactivate endothelium-derived relaxing factors. *Am J Physiol* 1986; 250: H822–H827
- Rubbo H, Tarpey M, Freeman BA. Nitric oxide and reactive oxygen species in vascular injury. *Biochem Soc Symp* 1995; 61: 33–45
- Griendling KK, Sorescu D, Ushio-Fukai M. NAD(P)H oxidase. Role in cardiovascular biology and disease. *Circ Res* 2000; 86: 494–501
- Ohara Y, Peterson TE, Harrison DG. Hypercholesterolemia increases endothelial superoxide anion production. *J Clin Invest* 1993; 91: 2546–2551
- Griendling KK, Minieri CA, Ollerenshaw JD, Alexander RW. Angiotensin II stimulates NADH and NADPH oxidase activity in cultured vascular smooth muscle cells. *Circ Res* 1994; 74: 1141–1148
- Cai H, Harrison CH. Endothelial dysfunction in cardiovascular diseases. The role of oxidant stress. *Circ Res* 2000; 87: 840–844
- Sanders SA, Eisenthal R, Harrison R. NADH oxidase activity of human xanthine oxidoreductase—generation of superoxide anion. *Eur J Biochem* 1997; 245: 541–548
- Pou S, Pou WS, Brecht DS, Snyder SH, Rosen GM. Generation of superoxide by purified brain nitric oxide synthase. *J Biol Chem* 1992; 267: 24173–24176
- Heinzel B, John M, Klatt P, Bohme E, Mayer B. Ca<sup>2+</sup>/calmodulin-dependent formation of hydrogen peroxide by brain nitric oxide synthase. *Biochem J* 1992; 281: 627–630
- Vasquez-Vivar J, Kalyanaraman B, Martasek P *et al*. Superoxide generation by endothelial nitric oxide synthase: the influence of cofactors. *Proc Natl Acad Sci USA* 1998; 95: 9220–9225
- Matoba T, Shimokawa H, Nakashima M *et al*. Hydrogen peroxide is an endothelium-derived hyperpolarizing factor in mice. *J Clin Invest* 2000; 106: 1521–1530
- Fridovich I. Superoxide anion radical (O<sub>2</sub><sup>-</sup>), superoxide dismutases and related matters. *J Biol Chem* 1997; 272: 18515–18517
- Stralin P, Karlsson K, Johansson BO, Markland SL. The interstitium of the human arterial wall contains very large

- amounts of extracellular superoxide dismutase. *Arterioscler Thromb Vasc Biol* 1995; 15: 2032–2036
42. Oury TD, Day BJ, Crapo JD. Extracellular superoxide dismutase: a regulator of nitric oxide bioavailability. *Lab Invest* 1996; 75: 617–636
  43. Suzuki H, Swei A, Zweifach BW, Schmid-Schonbein GW. *In vivo* evidence for microvascular oxidative stress in spontaneously hypertensive rats: hydroethidine microfluorography. *Hypertension* 1995; 25: 1083–1089
  44. Grunfeld S, Hamilton CA, Mesaros S *et al*. Role of superoxide in the depressed nitric oxide production by the endothelium of genetically hypertensive rats. *Hypertension* 1995; 26: 854–857
  45. Swei A, Lacy F, DeLano FA, Schmid-Schonbein GW. Oxidative stress in the Dahl hypertensive rat. *Hypertension* 1997; 30: 1628–1633
  46. Yelinova VI, Khrantsov VV, Markel AL. Manifestation of oxidative stress in the pathogenesis of arterial hypertension in ISIAH rats. *Biochem Biophys Res Commun* 1999; 24: 450–453
  47. Schnackenberg CG, Welch WJ, Wilcox CS. Normalization of blood pressure and renal vascular resistance in SHR with a membrane-permeable superoxide dismutase mimetic: role of nitric oxide. *Hypertension* 1998; 32: 59–64
  48. Somers MJ, Mavromatis K, Galis ZS, Harrison DG. Vascular superoxide production and vasomotor function in hypertension induced by deoxycorticosterone acetate-salt. *Circulation* 2000; 101: 1722–1728
  49. Heitzer T, Wenzel U, Hink U *et al*. Increased NAD(P)H oxidase-mediated superoxide production in renovascular hypertension: evidence for an involvement of protein kinase. *Kidney Int* 1999; 55: 252–260
  50. Fukai T, Ishizaka N, Rajagopalan S *et al*. p22phox mRNA expression and NADPH oxidase activity are increased in aortas from hypertensive rats. *Circ Res* 1997; 80: 45–51
  51. Zalba G, Beaumont FJ, San Jose G *et al*. Vascular NADH/NADPH oxidase is involved in enhanced superoxide production in spontaneously hypertensive rats. *Hypertension* 2000; 35: 1055–1061
  52. Ito H, Torri M, Suzuki T. Decreased superoxide dismutase activity in increased superoxide anion production in cardiac hypertrophy of spontaneously hypertensive rats. *Clin Exp Hypertens* 1995; 17: 803–816
  53. Nimoto S, Nishida S, Funasaka K, Nakano T, Teramoto K, Tomura TT. Regional distribution of superoxide dismutase in the brain and myocardium of the stroke-prone spontaneously hypertensive rat. *Clin Exp Pharmacol Physiol Suppl* 1995; 1: S160–161
  54. Shou I, Wang LN, Suzuki S, Fukui M, Tomino Y. Effects of antihypertensive drugs on antioxidant enzyme activities and renal function in stroke-prone spontaneously hypertensive rats. *Am J Med Sci* 1997; 314: 377–384
  55. Boegehold MA. Flow-dependent arteriolar dilation in normotensive rats fed low- or high-salt diets. *Am J Physiol* 1995; 269: H1407–1414
  56. Matrougui K, Schiavi P, Guez D, Henrion D. High Na intake decreases pressure-induced (myogenic) tone and flow-induced dilation in resistance arteries from hypertensive rats. *Hypertension* 1998; 32: 176–179
  57. d'Uscio LV, Barton M, Shaw S, Moreau P, Luscher TF. Structure and function of small arteries in salt-induced hypertension: effects of chronic endothelin-subtype-A-receptor blockade. *Hypertension* 1997; 30: 905–911
  58. White RM, Rivera CO, Davison CB. Differential contribution of endothelial function to vascular reactivity in conduit and resistance arteries from deoxycorticosterone-salt hypertensive rats. *Hypertension* 1996; 27: 1245–1253
  59. Lenda DM, Sauls BA, Boegehold MA. Reactive oxygen species may contribute to reduced endothelium-dependent dilation in rats fed high salt. *Am J Physiol* 2000; 279: H7–H14
  60. Jun T, Ke-yan F, Catalano M. Increased superoxide anion production in humans: a possible mechanism for the pathogenesis of hypertension. *J Hum Hypertens* 1996; 10: 305–309
  61. Pandey S, Gujrati VR, Chandravati, Sanger KC, Shanker K. Status of free radicals and their scavenging enzymes in pregnancy induced hypertension. *Boll Chim Farm* 1996; 135: 472–476
  62. Ge T, Hughes H, Junquero DC, Wu KK, Vanhoutte PM, Boulanger CM. Endothelium-dependent contractions are associated with both augmented expression of prostaglandin H synthase-1 and hypersensitivity to prostaglandin H in the SHR aorta. *Circ Res* 1995; 76: 1003–1010
  63. Luscher TF, Aarhus LL, Vanhoutte PM. Indomethacin improves the impaired endothelium-dependent relaxations in small mesenteric arteries of the spontaneously hypertensive rat. *Am J Hypertens* 1990; 3: 55–58
  64. Swei A, Lacy F, Delano FA, Parks DA, Schmid-Schonbein GW. A mechanism of oxygen free radical production in the Dahl hypertensive rat. *Microcirculation* 1999; 6: 179–187
  65. Rodriguez-Martinez MA, Garcia-Cohen EC, Baena AB, Gonzalez R, Salaices M, Marin J. Contractile responses elicited by hydrogen peroxide in aorta from normotensive and hypertensive rats. Endothelial modulation and mechanism involved. *Br J Pharmacol* 1998; 125: 1329–1335
  66. Kinoshita H, Kakutani T, Iranami H, Hatano Y. The role of oxygen-derived free radicals in augmented relaxations to levromakalim in the aorta from hypertensive rats. *Jpn J Pharmacol* 2001; 85: 29–33
  67. Lacy F, Kailasam MT, O'Connor DT, Schmid-Schonbein GW, Parmer RJ. Plasma hydrogen peroxide production in human essential hypertension: role of heredity, gender, and ethnicity. *Hypertension* 2000; 36: 878–884
  68. Chobanian AV, Alexander RW. Exacerbation of atherosclerosis by hypertension. Potential mechanisms and clinical implications. *Arch Intern Med* 1996; 156: 1952–1956
  69. Solzbach U, Hornig B, Jeserich M, Just H. Vitamin C improves endothelial dysfunction of epicardial coronary arteries in hypertensive patients. *Circulation* 1997; 96: 1513–1519
  70. Sherman DL, Keaney JF Jr, Biegelsen ES, Duffy SJ, Coffman JD, Vita JA. Pharmacological concentrations of ascorbic acid are required for the beneficial effect on endothelial vasomotor function in hypertension. *Hypertension* 2000; 35: 936–941
  71. Miyamoto Y, Akaike T, Yoshida M, Goto S, Horie H, Maeda H. Potentiation of nitric oxide-mediated vasorelaxation by xanthine oxidase inhibitors. *Proc Soc Exp Biol Med* 1996; 211: 366–373
  72. Mervaala EMA, Cheng ZJ, Tikkanen I *et al*. Endothelial dysfunction and xanthine oxidoreductase activity in rats with human renin and angiotensinogen genes. *Hypertension* 2001; 37: 414–418
  73. Cardillo C, Kilcoyne CM, Cannon RO 3rd, Quyyumi AA, Panza JA. Xanthine oxidase inhibition with oxypurinol improves endothelial vasodilator function in hypercholesterolemic but not in hypertensive patients. *Hypertension* 1997; 30: 57–63
  74. Hirooka Y, Imaizumi T, Masaki H *et al*. Captopril improves impaired endothelium-dependent vasodilatation in hypertensive patients. *Hypertension* 1992; 20: 175–180
  75. Taddei S, Virdis A, Ghiadoni L, Uleri S, Magagna A, Salvetti A. Lacidipine restores endothelium-dependent vasodilation in essential hypertensive patients. *Hypertension* 1997; 30: 1606–1612
  76. Lyons D, Webster J, Benjamin N. The effect of antihypertensive therapy on responsiveness to local intra-arterial N G-monomethyl-L-arginine in patients with essential hypertension. *J Hypertens* 1997; 12: 1047–1052
  77. Mak IT, Boehme P, Weglicki WB. Antioxidant effects of calcium channel blockers against free radical injury in endothelial cells. Correlation of protection with preservation of glutathione levels. *Circ Res* 1992; 70: 1099–1103
  78. Wiemer G, Linz W, Hatrik S, Scholkens BA, Malinski T. Angiotensin-converting enzyme inhibition alters nitric oxide and superoxide release in normotensive and hypertensive rats. *Hypertension* 1997; 30: 1183–1190
  79. Rajagopalan S, Kurz S, Munzel T *et al*. Angiotensin II-mediated hypertension in the rat increases vascular superoxide production via membrane NADH/NADPH oxidase activation. Contribution to alterations of vasomotor tone. *J Clin Invest* 1996; 97: 1916–1923
  80. Smith MC, Dunn MJ. Hypertension in renal parenchymal disease. In: Laragh JH, Brenner BM. eds. *Hypertension:*

- Pathophysiology, Diagnosis and Management*. Raven Press, New York, NY: 1995: 2081–2082
81. Vallance P, Leone A, Calver A, Collier J, Moncada S. Accumulation of an endogenous inhibitor of nitric oxide synthesis in chronic renal failure. *Lancet* 1992; 339: 572–575
  82. Kimura K, Nishio I. Impaired endothelium-dependent relaxation in mesenteric arteries of reduced renal mass hypertensive rats. *Scand J Clin Lab Invest* 1999; 59: 199–204
  83. Kari JA, Donald AE, Vallance DT *et al*. Physiology and biochemistry of endothelial function in children with chronic renal failure. *Kidney Int* 1997; 52: 468–472
  84. Annuk M, Lind L, Linde T, Fellstrom B. Impaired endothelium-dependent vasodilatation in renal failure in humans. *Nephrol Dial Transplant* 2001; 16: 302–306
  85. Hasselwander O, Young IS. Oxidative stress in chronic renal failure. *Free Radic Res* 1998; 29: 1–11
  86. Mimic-Oka J, Simic T, Djukanovic L, Reljic Z, Davicevic Z. Alteration in plasma antioxidant capacity in various degrees of chronic renal failure. *Clin Nephrol* 1999; 51: 233–241
  87. Martin-Mateo MC, Sanchez-Portugal M, Iglesias S, de Paula A, Bustamante J. Oxidative stress in chronic renal failure. *Ren Fail* 1999; 21: 155–167
  88. Yokozawa T, Dong E, Oura H *et al*. Magnesium lithospermate B suppresses the increase of active oxygen in rats after subtotal nephrectomy. *Nephron* 1997; 75: 88–93
  89. Van Den Branden C, Ceysens B, De Craemer D, De Bleser P, Hellemans K, Geerts A, Verbeelen D. Antioxidant enzyme gene expression in rats with remnant kidney induced chronic renal failure. *Exp Nephrol* 2000; 8: 91–96
  90. Hahn S, Kuemmerle NB, Chan W *et al*. Glomerulosclerosis in the remnant kidney rat is modulated by dietary alpha-tocopherol. *J Am Soc Nephrol* 1998; 9: 2089–2095
  91. Vaziri ND, Oveisi F, Ding Y. Role of increased oxygen free radical activity in the pathogenesis of uremic hypertension. *Kidney Int* 1998; 53: 1748–1754
  92. Hasdan G, Benchetrit S, Green J, Rashid G, Bernheim J, Rathaus M. Hypertension after 5/6 nephrectomy in rats is caused by increased vascular superoxide production. *XXXVIII Congress of the EDTA-ERA* (Vienna 2001)
